# Supplementary material for: CT-Based Radiomics and Deep Learning for BRCA Mutation and Progression-Free Survival Prediction in Ovarian Cancer Using a Multicentric Dataset
Source: Cancers (Basel). 2022 May 31;14(11):2739. doi: 10.3390/cancers14112739 (PMC9179845; doi:10.3390/cancers14112739)
Supplement: Supplementary file 1 [file cancers-14-02739-s001.zip › cancers-1682383-supplementary.pdf]

## Supplementary material

**Table S1**

The selected radiomic features are classified based on the feature family: intensity-based statistical features (F\_stat.), textural features based on the grey level co-occurrence matrix (F\_cm), textural features based on the grey level run length matrix (F\_rlm), textural features based on the grey level size zone matrix (F\_szm).

The full names of the selected radiomic features are available in the IBSI reference manual as follows:

- *Statistical features*

|                |                   |
|----------------|-------------------|
| 'F_stat.kurt'  | Kurtosis          |
| 'F_stat.min'   | Minimum intensity |
| 'F_stat.max'   | Maximum intensity |
| 'F_stat.range' | Intensity range   |

- *Textural features based on the grey level co-occurrence matrix*

|                               |                                                                       |
|-------------------------------|-----------------------------------------------------------------------|
| 'F_cm_merged.joint.max'       | Joint maximum, with merging by slice                                  |
| 'F_cm.diff.avg'               | Difference average                                                    |
| 'F_cm.diff.entr'              | Difference entropy                                                    |
| 'F_cm.inv.diff.norm'          | Normalised inverse difference                                         |
| 'F_cm.inv.var'                | Inverse variance                                                      |
| 'F_cm.corr'                   | Correlation                                                           |
| 'F_cm_merged.joint.entr'      | Joint entropy, with merging by slice                                  |
| 'F_cm_2.5D.energy'            | Energy (angular second moment), with merging by direction             |
| 'F_cm_2.5D.corr'              | Correlation, with merging by direction                                |
| 'F_cm.2.5Dmerged.info.corr.1' | First measure of information theoretic correlation, with full merging |

- *Textural features based on the grey level run length matrix*

|                   |                                      |
|-------------------|--------------------------------------|
| 'F_rlm.r.perc'    | Run percentage                       |
| 'F_rlm.glnu.norm' | Normalised grey level non-uniformity |

- *Textural features based on the grey level size zone matrix*

|                |                                     |
|----------------|-------------------------------------|
| 'F_szm.lze'    | Large zone emphasis                 |
| 'F_szm.z.perc' | Zone percentage                     |
| 'F_szm.lzhge'  | Large zone high grey level emphasis |
